# Supplementary material for: One-step green synthesis of composition-tunable Pt–Cu alloy nanowire networks with high catalytic activity for 4-nitrophenol reduction
Source: Royal Society of Chemistry journal article supplement (doi:10.1039/c8dt03810d), 2018-01-01
Supplement: c8dt03810d1.pdf [file c8dt03810d1.pdf]

## Supporting Information

### One-step green synthesis of composition-tunable Pt-Cu alloy nanowire networks with high catalytic activity for 4-nitrophenol reduction

Yingfang Zhang,<sup>ab</sup> Yan Xia,<sup>ab</sup> Saisai Yan,<sup>ab</sup> Jia Han,<sup>ab</sup> Yifan Chen,<sup>c</sup> Wenzhong Zhai<sup>ab</sup>  
and Zhinong Gao<sup>\*ab</sup>

<sup>a</sup> College of Chemistry and Molecular Sciences, Wuhan University, Wuhan 430072, Hubei, P.R. China.

<sup>b</sup> Key Laboratory of Biomedical Polymers, Ministry of Education of China, Wuhan 30072, Hubei, P.R. China.

<sup>c</sup> School of Materials Science and Chemistry Engineering, China University of Geosciences, Wuhan 430074, China

**\* Corresponding Authors**

E-mail: gzn@whu.edu.cn

### Detailed calculation of the reaction rate constant and activity factor:

In terms of the reaction kinetics, as the quantity of  $\text{BH}_4^-$  was much higher than that of 4-NP within this system, it was considered as a constant. The catalytic reduction reaction can be considered as a pseudo first-order kinetics, i.e. equation (1):

$$\ln(A_t/A_0) = -kt \quad (1)$$

where  $A_t$  and  $A_0$  are the associated absorbance of 4-NP at time  $t$  and the initial stage ( $\lambda=400$  nm), respectively (*J. Mater. Chem.*, **2012**, *22*, 18327-18334). As expected, a good linear correlation of  $\ln(A_t/A_0)$  versus the reaction time was obtained, and the rate constant ( $K$ ) can be estimated based on the regression of the slope from the logarithm. Therefore, the  $K$  for PtCu NWNs was calculated to be  $1.339 \times 10^{-2} \text{ s}^{-1}$ , while those of the PtCu<sub>2</sub> NWNs, Pt<sub>2</sub>Cu NWNs, Pt<sub>4</sub>Cu NWNs, pure Pt NWNs and Pt/C were calculated as  $7.02 \times 10^{-3} \text{ s}^{-1}$ ,  $3.42 \times 10^{-3} \text{ s}^{-1}$ ,  $1.51 \times 10^{-3} \text{ s}^{-1}$ ,  $1.16 \times 10^{-3} \text{ s}^{-1}$  and  $1.03 \times 10^{-3} \text{ s}^{-1}$ , respectively.

To compare our results with the literature reported, we calculated the activity parameter  $k$ , which was the ratio of the rate constant to the total mass of the catalyst, i.e. equation (2):

$$k = K/m. \quad (2)$$

where  $m$  is the total mass of the catalyst (200  $\mu\text{g}$ ). The activity factor( $k$ ) of PtCu NWNs was  $66.95 \text{ s}^{-1} \text{ g}^{-1}$ , while those of the PtCu<sub>2</sub> NWNs, Pt<sub>2</sub>Cu NWNs, Pt<sub>4</sub>Cu NWNs, pure Pt NWNs and Pt/C were calculated as  $35.1 \text{ s}^{-1} \text{ g}^{-1}$ ,  $17.1 \text{ s}^{-1} \text{ g}^{-1}$ ,  $7.55 \text{ s}^{-1} \text{ g}^{-1}$ ,  $5.8 \text{ s}^{-1} \text{ g}^{-1}$  and  $5.15 \text{ s}^{-1} \text{ g}^{-1}$ , respectively. Therefore, the catalytic activity ranking was PtCu NWNs > PtCu<sub>2</sub> NWNs > Pt<sub>2</sub>Cu NWNs > Pt<sub>4</sub>Cu NWNs > Pt NWNs > commercial Pt/C.

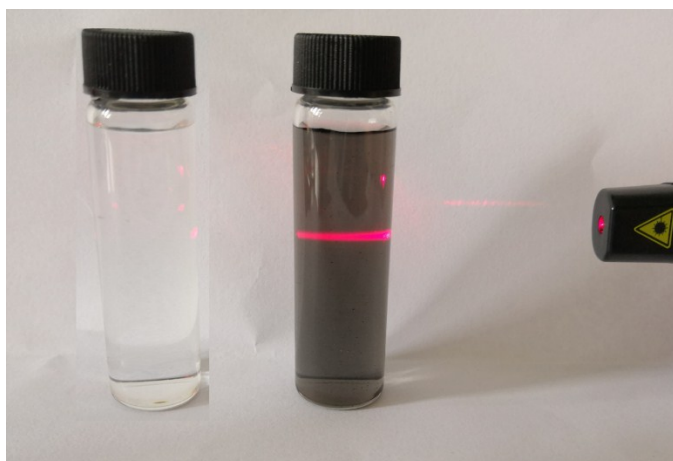

**Fig. S1** Tyndall phenomenon of the PtCu NWNs.

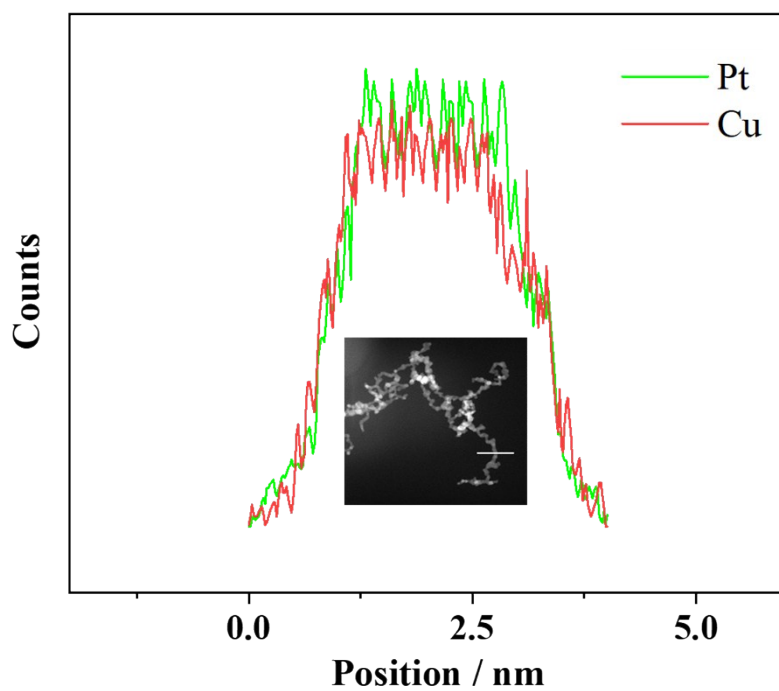

**Fig. S2** EDS line scanning profiles of the as-prepared PtCu NWNs.

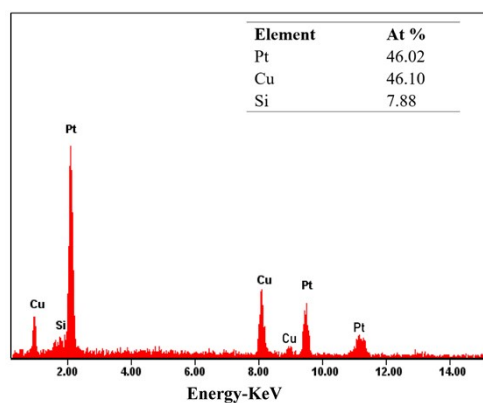

**Fig. S3** EDS pattern of the as-prepared PtCu NWNs

**Table S1.** Molar ratio of Pt to Cu for PtCu NWNs measured by ICP-AES.

| Sample          | Pt   | Cu   |
|-----------------|------|------|
| mg/L            | 6.81 | 2.12 |
| Molar ratio (%) | 51   | 49   |

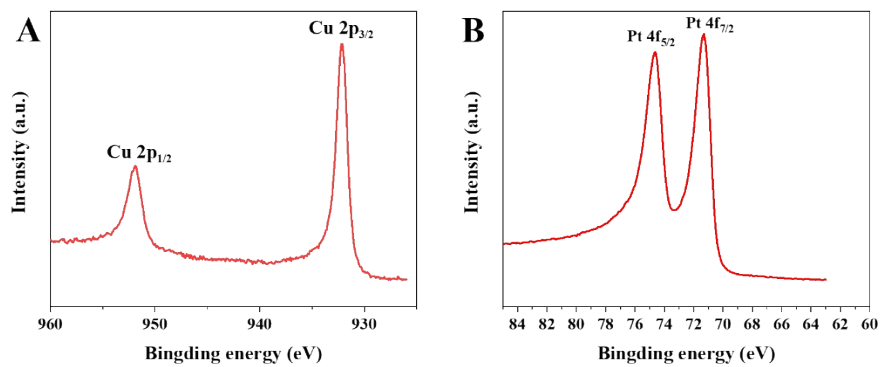

**Fig. S4** The binding energies (BEs) of the PtCu NWNs: (A) the Pt4f peaks, (B) the Cu2p peaks.

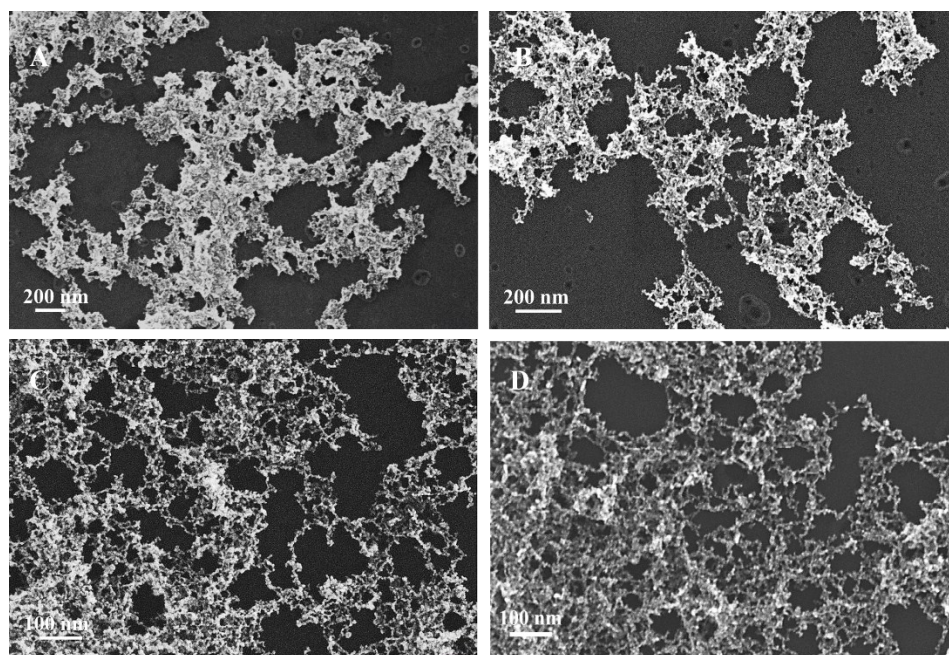

**Fig. S5** SEM images of time-dependent intermediate products of the PtCu NWNs.

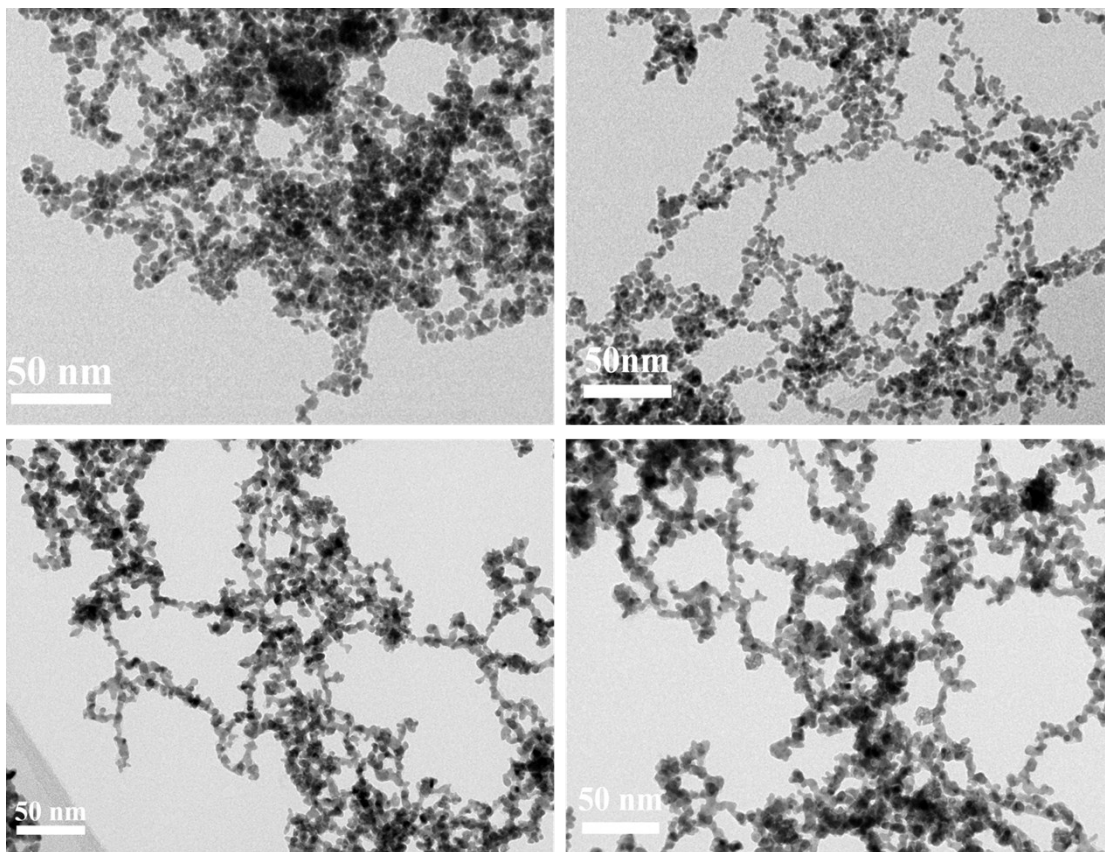

**Fig. S6** TEM images of time-dependent intermediate products of the PtCu NWNs

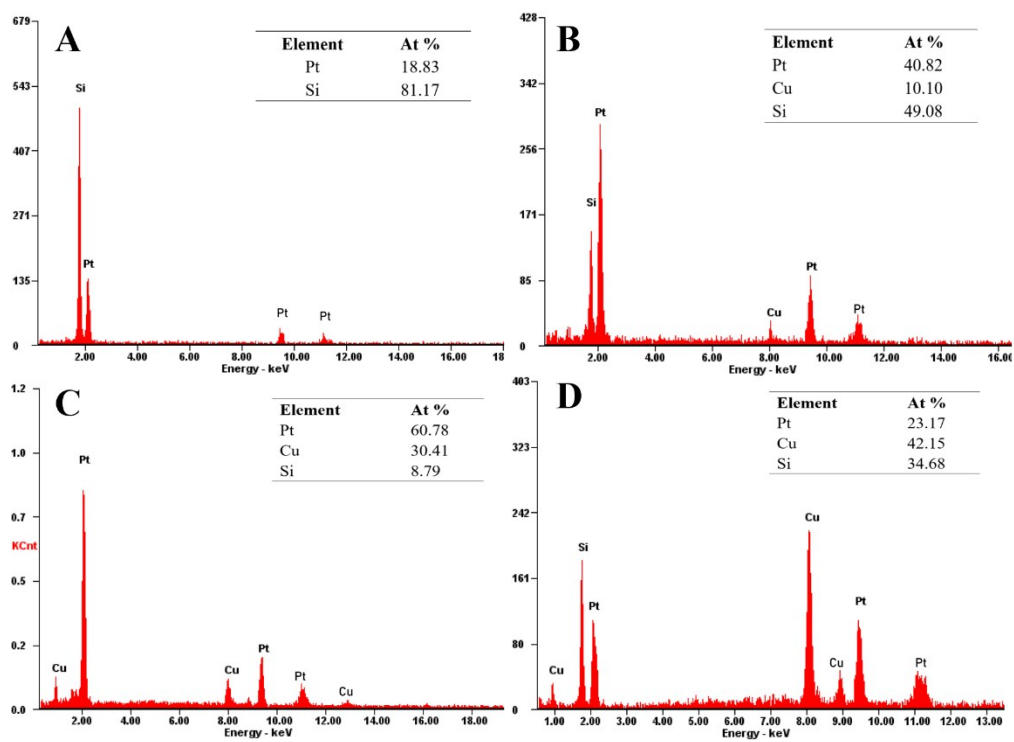

**Fig. S7** EDS patterns of the product prepared under different molar ratio of Pt and Cu precursors: (A) pure Pt, (B) 4:1, (C) 2:1, (D) 1:2.



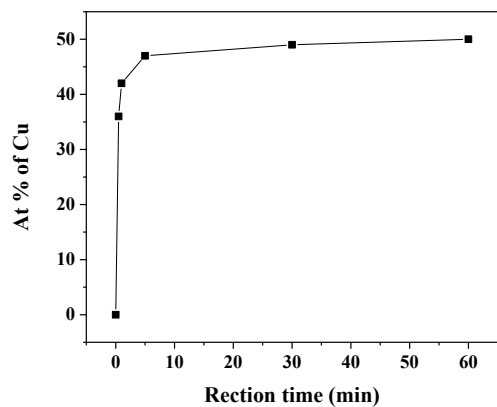

**Fig. S8.** The composition ratio changes of Cu to Pt in intermediate products of the PtCu NWs, as determined by EDS spectra.

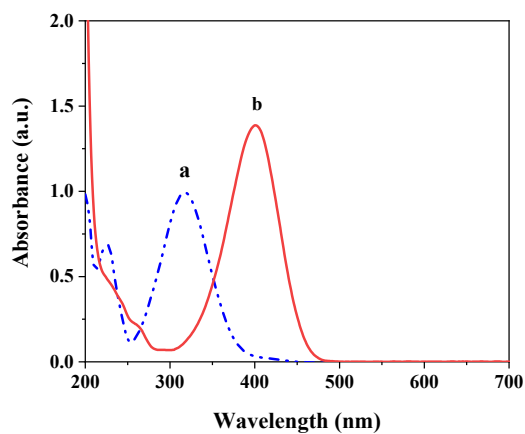

**Fig. S9** UV-vis spectra of (a) 4-NP before adding  $\text{NaBH}_4$ , (b) 4-nitrophenolate formation in the presence of  $\text{NaBH}_4$ .

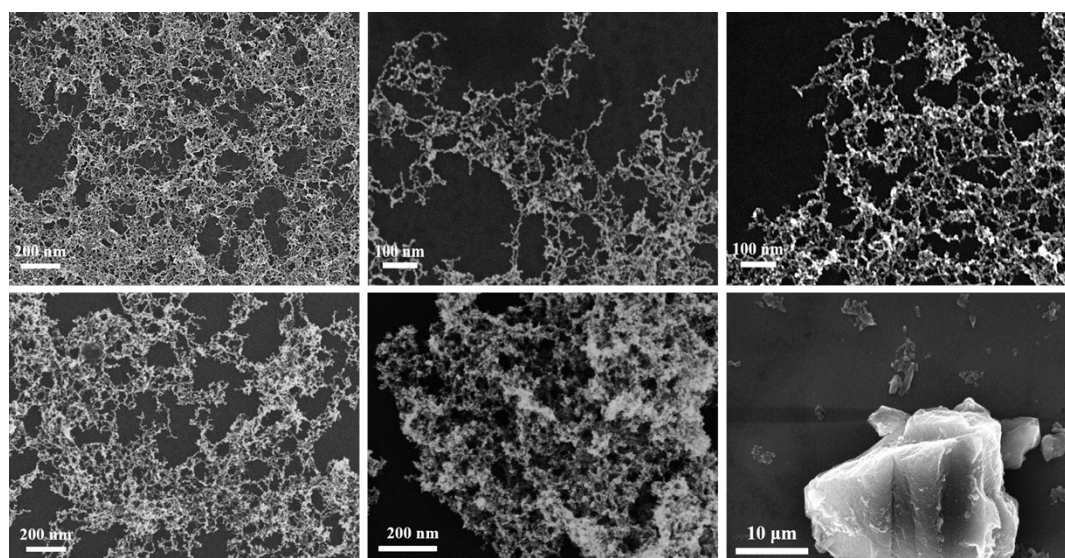

**Fig. S10** SEM images of catalysts after the catalytic assays: (A) Pt NWNs; (B)  $\text{Pt}_4\text{Cu}$  NWNs; (C)  $\text{Pt}_2\text{Cu}$  NWNs; (D) PtCu NWNs; (E)  $\text{PtCu}_2$  NWNs and (F) commercial Pt/C.

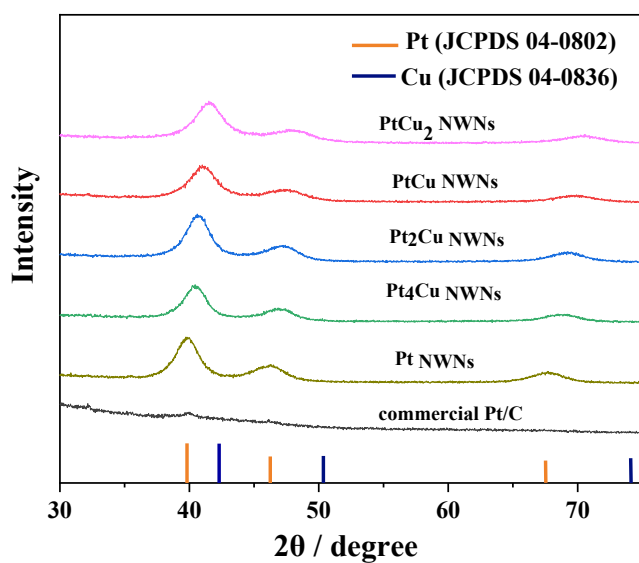

Fig. S11 XRD pattern of catalysts after the catalytic assays

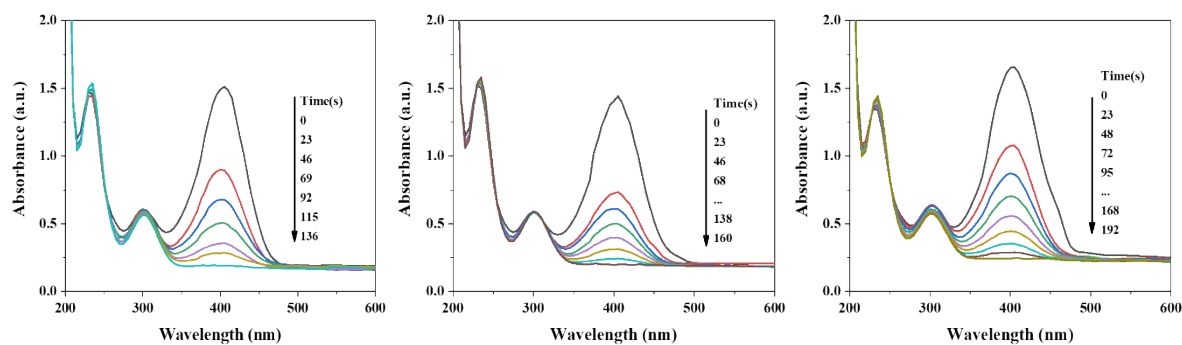

Fig. S12 Time-dependent UV-vis absorption spectra of 4-NP catalytic reduction for 3 cycles.

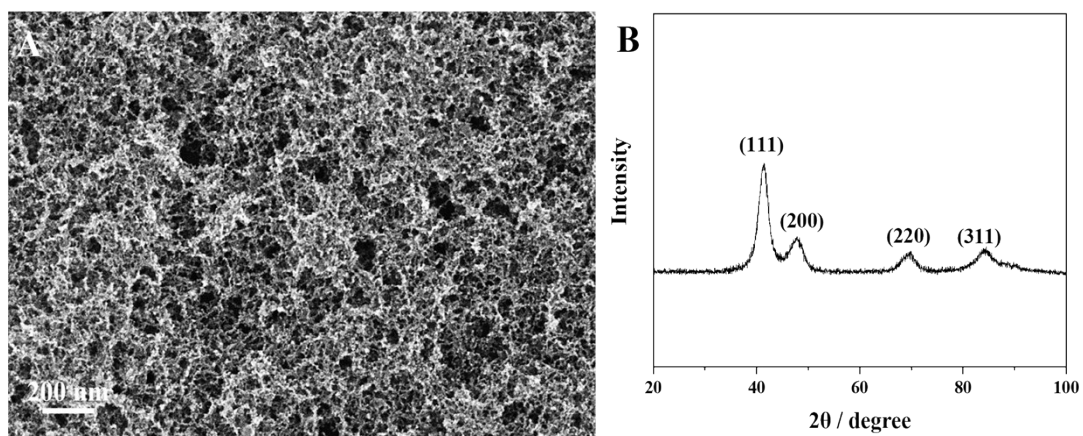

Fig. S13 SEM image (a) and XRD pattern (b) of PtCu NWNs after the catalytic assays.
